# Supplementary material
Source: PubMed Central journal article supplement (PMC7398584)
Supplement: NIHMS1612815-supplement-si.pdf [file NIHMS1612815-supplement-si.pdf]

**Electronic Supplementary Information**

**Biological active camellia oleifera protein nanoparticles for improving  
tumor microenvironment and drug delivery**

Xiaoping Qian<sup>a</sup>, Tinghui Shen<sup>a</sup>, Xiaoke Zhang<sup>a</sup>, Chongzhi Wang<sup>a</sup>, Weibo Cai<sup>b</sup>, Rongshi Cheng<sup>a</sup>,  
Xiqun Jiang<sup>\*a</sup>

<sup>a</sup> MOE Key Laboratory of High Performance Polymer Materials and Technology, Department of Polymer Science & Engineering, College of Chemistry & Chemical Engineering, and Jiangsu Key Laboratory for Nanotechnology, Nanjing University, Nanjing, 210023, People's Republic of China

<sup>b</sup> Department of Radiology, University of Wisconsin-Madison, Madison, WI 53705, USA

## Table of Contents of Supplementary Information

Fig. S1 SDS-PAGE banding patterns of purified COP.

Fig. S2 CLSM images of CT26 and H22 cells incubated with DOX-loaded COP NPs.

Fig. S3 The penetrate depth of COP NPs in CT26 MCTs measured by ZEN software.

Fig. S4 In vitro drug release profile of DOX.

Fig. S5 The cytotoxicity of free DOX and D-COP NPs against CT26 cells and H22 cells.

Fig. S6 CLSM images of collagen I, hyaluronan and TGF- $\beta$ 1 of sliced H22 tumor.

Fig. S7 Semi-quantitative fluorescence intensity calculated from Fig. S3.

Fig. S8 Biodistribution of DOX in H22 tumor-bearing mice.

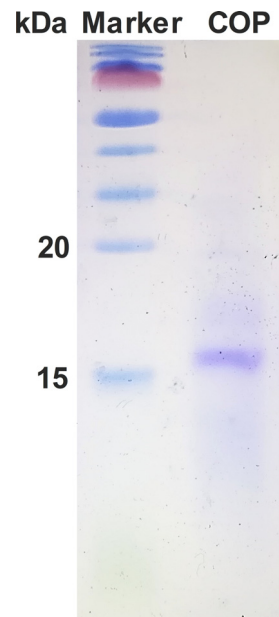

**Fig. S1** Sodium dodecyl sulfate polyacrylamide gel electrophoresis (SDS-PAGE) banding patterns of purified COP.

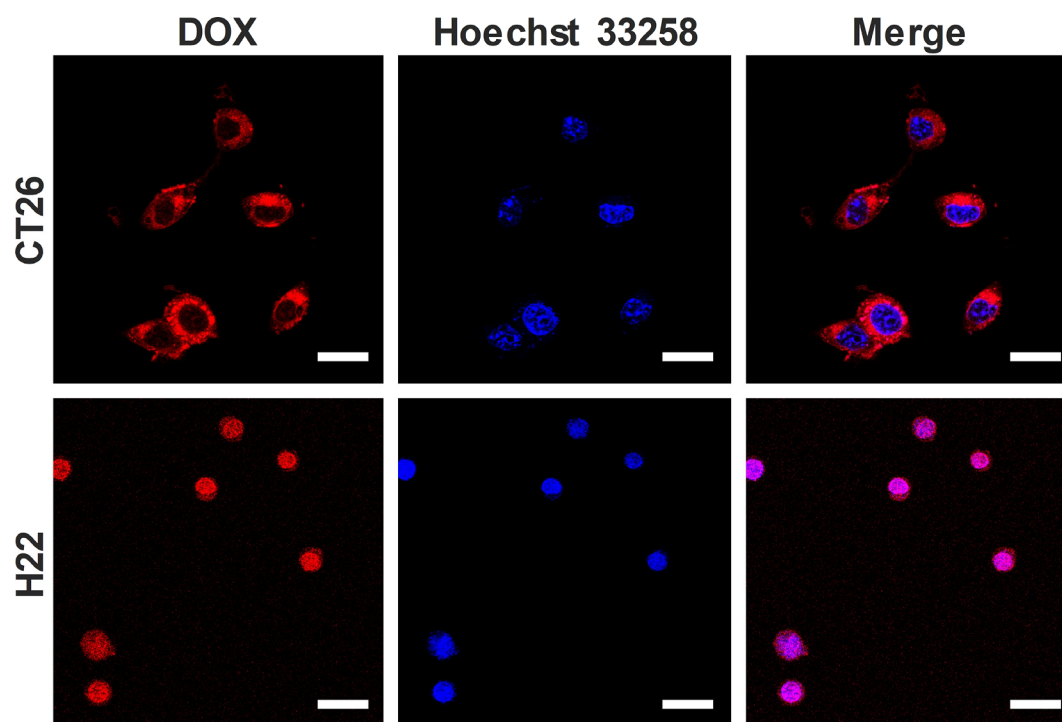

**Fig. S2** CLSM images of CT26 and H22 cells incubated with DOX-loaded COP NPs. Red represents DOX and blue represents cell nucleus. Scale bar = 20  $\mu$ m.

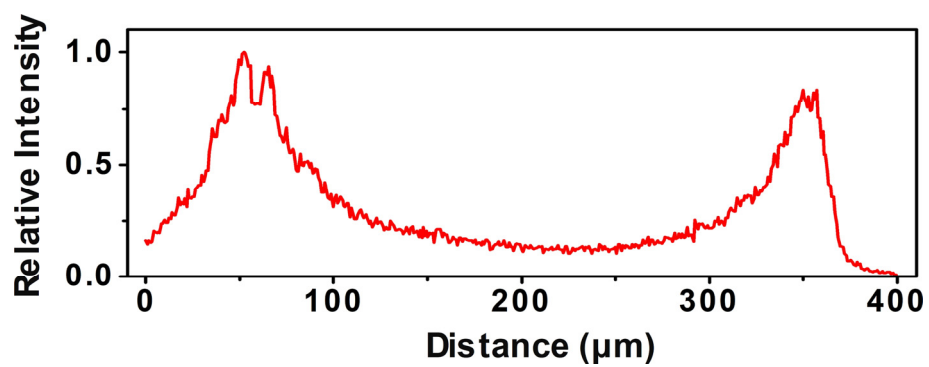

**Fig. S3** The penetrate depth of COP NPs in CT26 MCTs measured by ZEN software.

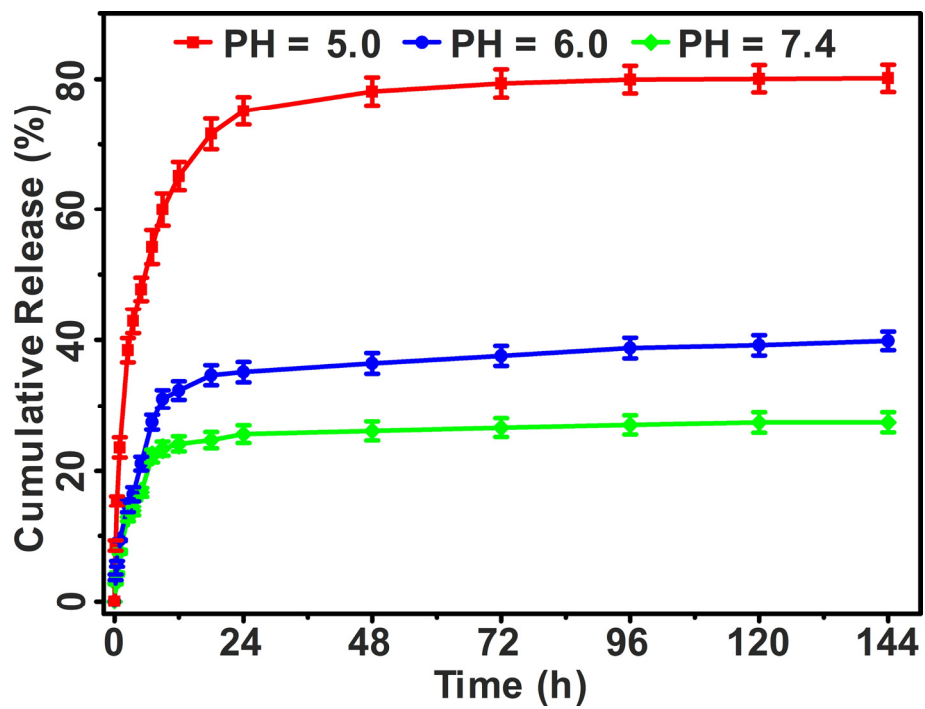

**Fig. S4** Drug release profile of DOX from DOX-loaded COP NPs in 0.01 M PBS at PH 5.0, 6.0 and 7.4 at 37 °C in vitro. Data is represented as mean  $\pm$  SD (N = 3).

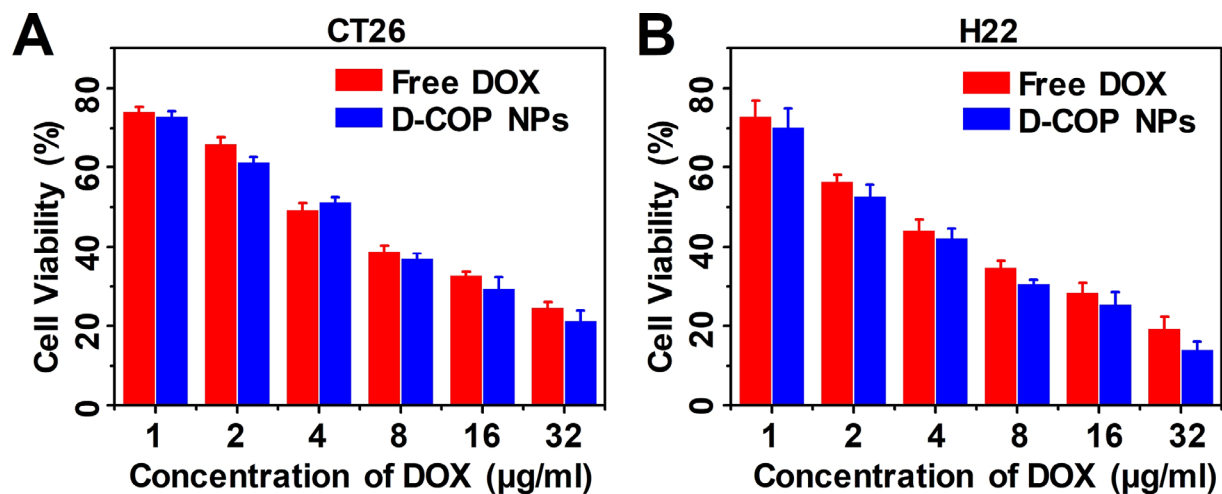

**Fig. S5** The cytotoxicity of free DOX and D-COP NPs against (A) CT26 cells and (B) H22 cells after co-cultured for 48 h. Data is represented as mean  $\pm$  SD (N = 3).

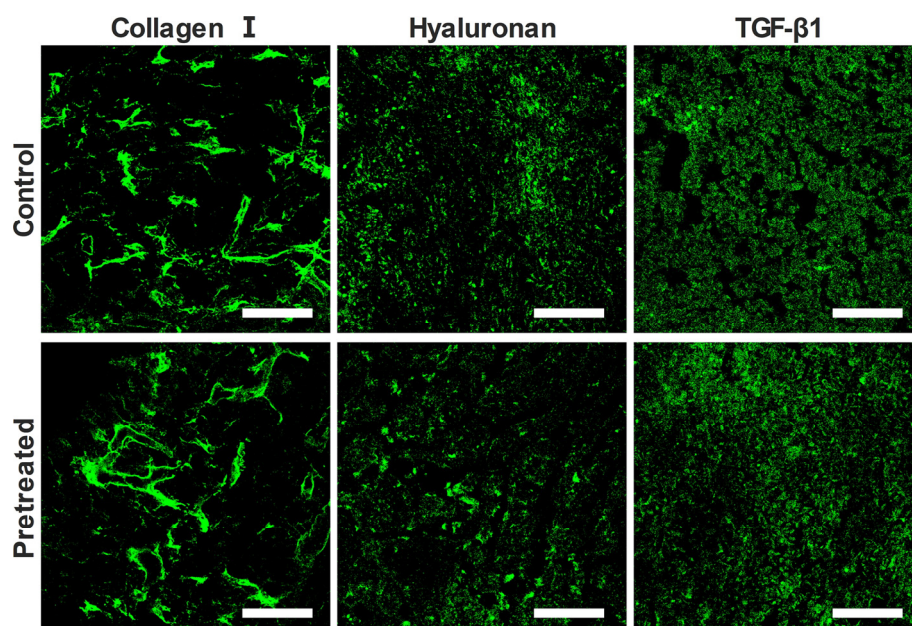

**Fig. S6** Confocal laser scanning microscopy (CLSM) images of collagen I, hyaluronan and TGF- $\beta$ 1 of sliced H22 tumor before and after treatment with COP NPs. Scale bar = 100  $\mu$ m.



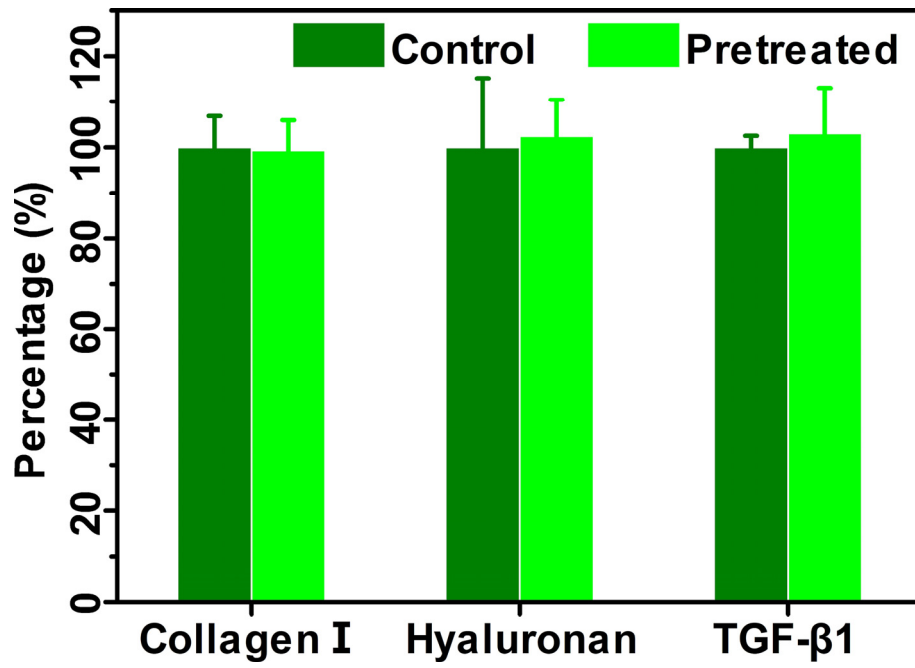

**Fig. S7** Semi-quantitative fluorescence intensity calculated from Fig. S3. The control group was normalized as 100% individually.

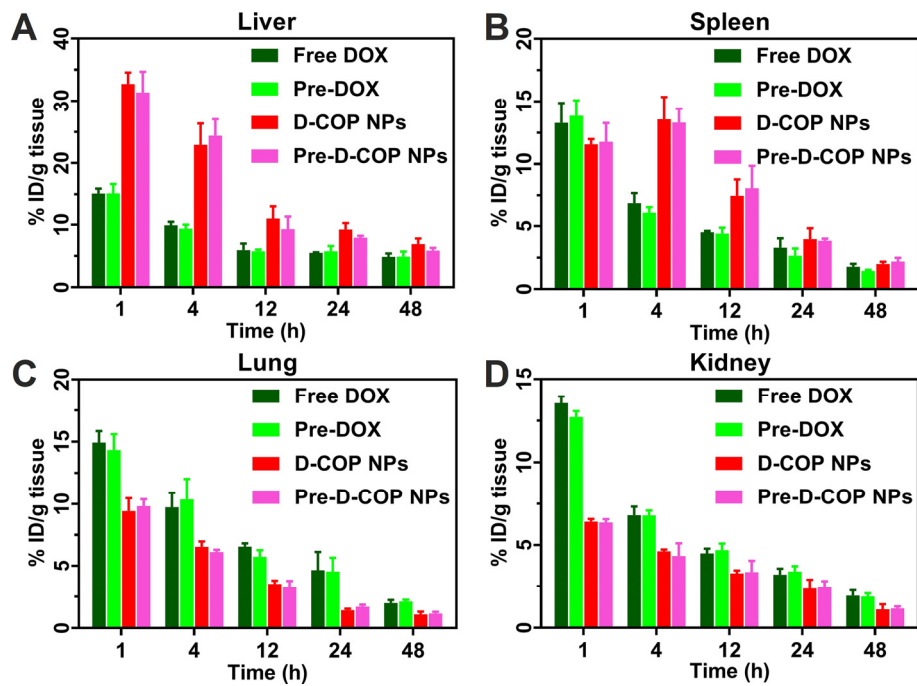

**Fig. S8** Biodistribution of DOX in liver (A), spleen (B), lung (C) and kidney (D) of H22 tumor-bearing mice at various time points after i.v. injection of free DOX or D-COP NPs. Data is represented as mean  $\pm$  SD (N = 3).
